# Supplementary material for: Multi-Design Differential Expression Profiling of COVID-19 Lung Autopsy Specimens Reveals Significantly Deregulated Inflammatory Pathways and SFTPC Impaired Transcription
Source: MDPI journal article supplement (doi:10.3390/cells11061011), 2022-03-16
Supplement: s1 [file s1]

**A**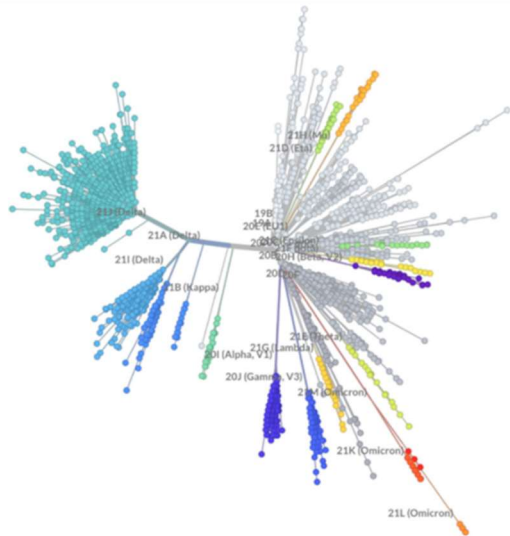**B**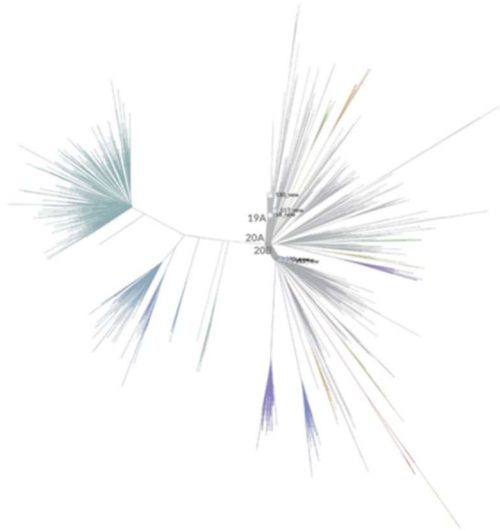

**Figure S1:** Phylogeny by nextclade: **(A)** SARS-CoV-2 phylogeny as described until 1st February 2022. **(B)** The detected clades in the six high viral load samples.
